# Supplementary material
Source: PubMed Central journal article supplement (PMC8858709)
Supplement: mmc1.pdf [file mmc1.pdf]

**Appendix**  
**Injury-Related Emergency Department Visits During the COVID-19 Pandemic**  
**Law et al.**

**Appendix Table 1.** Overall Estimated Injury-Related Emergency Department Visits by Injury Cause, U.S. – January 1, 2018–December 31, 2020

| Variable                   | 2018                                   | 2019                                   | Difference (2018 and 2019) |                         | 2020                                   | Difference (2019 and 2020) |                        |
|----------------------------|----------------------------------------|----------------------------------------|----------------------------|-------------------------|----------------------------------------|----------------------------|------------------------|
|                            | N<br>(95% CI)                          | N<br>(95% CI)                          | N (%)                      | (95% CI)                | N<br>(95% CI)                          | N (%)                      | (95% CI)               |
| All injuries               | 28,028,762<br>(23,943,628, 32,113,896) | 26,910,333<br>(22,914,726, 30,905,940) | -1,118,429<br>(-4.0)       | (-6,832,727, 4,595,869) | 22,322,771<br>(18,563,266, 26,082,276) | -4,587,562<br>(-17.0)      | (-10,073,796, 898,672) |
| Self-harm <sup>a</sup>     | 495,348<br>(403,816, 586,880)          | 493,039<br>(407,287, 578,791)          | -2,309<br>(-0.5)           | (-127,733, 123,115)     | 471,308<br>(366,546, 576,070)          | -21,731<br>(-4.4)          | (-157,114, 113,652)    |
| Assault <sup>a</sup>       | 1,625,082<br>(1,134,376, 2,115,788)    | 1,594,137<br>(1,123,843, 2,064,431)    | -30,945<br>(-1.9)          | (-710,628, 648,738)     | 1,461,557<br>(992,417, 1,930,697)      | -132,580<br>(-8.3)         | (-796,861, 531,701)    |
| Falls <sup>a</sup>         | 8,190,469<br>(6,820,090, 9,560,848)    | 8,072,616<br>(6,630,423, 9,514,809)    | -117,853<br>(-1.4)         | (-2,107,290, 1,871,584) | 6,684,409<br>(5,258,215, 8,110,603)    | -1,388,207<br>(-17.2)      | (-3,416,495, 640,081)  |
| Motor vehicle <sup>a</sup> | 3,432,165<br>(2,787,482, 4,076,848)    | 3,300,329<br>(2,704,303, 3,896,355)    | -131,836<br>(-3.8)         | (-1,009,824, 746,152)   | 2,816,680<br>(2,240,852, 3,392,508)    | -483,649<br>(-14.7)        | (-1,312,398, 345,100)  |
| Poisoning <sup>a</sup>     | 1,949,020<br>(1,504,512, 2,393,528)    | 1,992,157<br>(1,542,021, 2,442,293)    | 43,137<br>(2.2)            | (-589,484, 675,758)     | 1,969,850<br>(1,517,611, 2,422,089)    | -22,307<br>(-1.1)          | (-660,383, 615,769)    |

*Notes:* 95% CIs were calculated using the SAS SURVEYMEANS procedure that accounted for the sample weights and complex sample design.

<sup>a</sup>Self-harm included nonfatal injury or poisoning resulting from a deliberate violent act inflicted on oneself with the intent to take one's own life or with the intent to harm oneself; assault included nonfatal injuries where physical force by one or more persons is used with the intent of causing harm, injury, or death to another person, including intentional poisoning by another person and sexual assault; falls included nonfatal injuries received when a person descends abruptly due to the force of gravity and strikes a surface at the same or lower level; motor vehicle included nonfatal injury to a driver or passenger of a motor vehicle caused by a collision, rollover, crash or some other event involving another vehicle, an object, or a pedestrian; and poisoning included nonfatal ingestion, inhalation, absorption through the skin, or injection of so much of a drug, toxin, or other chemical that a harmful effect results (e.g., alcohol intoxication, drug overdose, carbon monoxide exposure).

Data source: National Electronic Injury Surveillance System – All Injuries program.

**Appendix**  
**Injury-Related Emergency Department Visits During the COVID-19 Pandemic**  
**Law et al.**

**Appendix Table 2.** Estimated Injury-Related Emergency Department Visits by Sex and Age, U.S. – January 1, 2019–December 31, 2020

| Variable                         | 2019<br>(column %) | (95% CI)                 | 2020<br>(column %) | (95% CI)                 | Difference N (%)   | (Difference 95% CI)            |
|----------------------------------|--------------------|--------------------------|--------------------|--------------------------|--------------------|--------------------------------|
| <b>All injuries</b>              |                    |                          |                    |                          |                    |                                |
| Sex                              |                    |                          |                    |                          |                    |                                |
| Male                             | 14,590,326 (52.3)  | (12,411,729, 16,768,923) | 12,440,980 (55.7)  | (10,335,979, 14,545,981) | -2,149,346 (-14.8) | (-5,178,753, 880,061)          |
| Female                           | 12,319,385 (47.7)  | (10,383,814, 14,254,956) | 9,880,551 (44.3)   | (8,112,480, 11,648,622)  | -2,438,834 (-19.8) | (-5,060,381, 182,713)          |
| Age category                     |                    |                          |                    |                          |                    |                                |
| 0–19 years                       | 6,041,740 (22.5)   | (5,035,423, 7,048,057)   | 4,369,310 (19.6)   | (3,599,024, 5,139,596)   | -1,672,430 (-27.6) | <b>(-2,939,717, -405,143)*</b> |
| 20–35 years                      | 6,743,595 (25.1)   | (5,722,351, 7,764,839)   | 5,809,177 (26.0)   | (4,845,073, 6,773,281)   | -934,418 (-13.8)   | (-2,338,852, 470,016)          |
| 36–59 years                      | 7,811,976 (29.0)   | (6,556,108, 9,067,844)   | 6,698,328 (30.0)   | (5,510,650, 7,886,006)   | -1,113,648 (-14.2) | (-2,842,168, 614,872)          |
| >60 years                        | 6,306,339 (23.4)   | (4,854,077, 7,758,601)   | 5,438,467 (24.4)   | (3,996,622, 6,880,312)   | -867,872 (-13.8)   | (-2,914,328, 1,178,584)        |
| <b>Self-harm<sup>a</sup></b>     |                    |                          |                    |                          |                    |                                |
| Sex                              |                    |                          |                    |                          |                    |                                |
| Male                             | 199,530 (40.5)     | (161,332, 237,728)       | 191,467 (40.6)     | (145,922, 237,012)       | -8,063 (-4.0)      | (-67,506, 51,380)              |
| Female                           | 293,501 (59.5)     | (242,063, 344,939)       | 279,723 (59.4)     | (217,954, 341,492)       | -13,778 (-4.7)     | (-94,160, 66,604)              |
| Age category                     |                    |                          |                    |                          |                    |                                |
| 0–19 years                       | 148,433 (30.1)     | (116,556, 180,310)       | 148,405 (31.5)     | (108,811, 187,999)       | -28 (0.0)          | (-50,859, 50,803)              |
| 20–35 years                      | 177,572 (36.0)     | (142,353, 212,791)       | 168,975 (35.9)     | (129,508, 208,442)       | -8,597 (-4.8)      | (-61,493, 44,299)              |
| 36–59 years                      | 138,215 (28.0)     | (110,256, 166,174)       | 126,096 (26.8)     | (98,905, 153,287)        | -12,119 (-8.8)     | (-51,121, 26,883)              |
| >60 years                        | 28,818 (5.8)       | (23,240, 34,396)         | 27,785 (5.9)       | (18,544, 37,026)         | -1,033 (-3.6)      | (-11,827, 9,761)               |
| <b>Assault<sup>a</sup></b>       |                    |                          |                    |                          |                    |                                |
| Sex                              |                    |                          |                    |                          |                    |                                |
| Male                             | 980,391 (61.5)     | (638,685, 1,322,097)     | 918,455 (62.8)     | (569,796, 1,267,114)     | -61,936 (-6.3)     | (-550,123, 426,251)            |
| Female                           | 613,747 (38.5)     | (479,448, 748,046)       | 543,052 (37.2)     | (415,905, 670,199)       | -70,695 (-11.5)    | (-255,635, 114,245)            |
| Age category                     |                    |                          |                    |                          |                    |                                |
| 0–19 years                       | 258,572 (16.2)     | (203,427, 313,717)       | 190,260 (13.0)     | (148,645, 231,875)       | -68,312 (-26.4)    | (-137,396, 772)                |
| 20–35 years                      | 733,494 (46.0)     | (504,256, 962,732)       | 677,234 (46.3)     | (451,491, 902,977)       | -56,260 (-7.7)     | (-377,990, 265,470)            |
| 36–59 years                      | 520,339 (32.6)     | (346,113, 694,565)       | 503,450 (34.4)     | (322,411, 684,489)       | -16,889 (-3.2)     | (-268,145, 234,367)            |
| >60 years                        | 79,838 (5.0)       | (55,803, 103,873)        | 87,814 (6.0)       | (59,545, 116,083)        | 7,976 (10)         | (-29,131, 45,083)              |
| <b>Falls<sup>a</sup></b>         |                    |                          |                    |                          |                    |                                |
| Sex                              |                    |                          |                    |                          |                    |                                |
| Male                             | 3,642,595 (45.1)   | (3,045,512, 4,239,678)   | 3,063,494 (45.8)   | (2,450,937, 3,676,051)   | -579,101 (-15.9)   | (-1,434,516, 276,314)          |
| Female                           | 4,429,971 (54.9)   | (3,562,796, 5,297,146)   | 3,620,864 (54.2)   | (2,791,192, 4,450,536)   | -809,107 (-18.3)   | (-2,009,252, 391,038)          |
| Age category                     |                    |                          |                    |                          |                    |                                |
| 0–19 years                       | 1,809,561 (22.4)   | (1,461,996, 2,157,126)   | 1,308,868 (19.6)   | (1,046,765, 1,570,971)   | -500,693 (-27.7)   | <b>(-936,009, -65,377)*</b>    |
| 20–35 years                      | 911,389 (11.3)     | (772,331, 1,050,447)     | 733,443 (11.0)     | (601,172, 865,714)       | -177,946 (-19.5)   | (-369,865, 13,973)             |
| 36–59 years                      | 1,680,455 (20.8)   | (1,424,540, 1,936,370)   | 1,396,243 (20.9)   | (1,146,257, 1,646,229)   | -284,212 (-16.9)   | (-641,963, 73,539)             |
| >60 years                        | 3,670,593 (45.5)   | (2,756,796, 4,584,390)   | 3,245,317 (48.6)   | (2,296,524, 4,194,110)   | -425,276 (-11.6)   | (-1,742,559, 892,007)          |
| <b>Motor vehicle<sup>a</sup></b> |                    |                          |                    |                          |                    |                                |
| Sex                              |                    |                          |                    |                          |                    |                                |
| Male                             | 1,743,225 (52.8)   | (1,434,102, 2,052,348)   | 1,581,040 (56.1)   | (1,257,907, 1,904,173)   | -162,185 (-9.3)    | (-609,367, 284,997)            |
| Female                           | 1,557,066 (47.2)   | (1,258,517, 1,855,615)   | 1,235,527 (43.9)   | (969,982, 1,501,072)     | -321,539 (-20.7)   | (-721,095, 78,017)             |

**Appendix**  
**Injury-Related Emergency Department Visits During the COVID-19 Pandemic**  
**Law et al.**

|                              |                  |                      |                  |                      |                  |                     |
|------------------------------|------------------|----------------------|------------------|----------------------|------------------|---------------------|
| <b>Age category</b>          |                  |                      |                  |                      |                  |                     |
| 0–19 years                   | 602,324 (18.3)   | (503,581, 701,067)   | 532,217 (18.9)   | (432,331, 632,103)   | –70,107 (–11.6)  | (–210,561, 70,347)  |
| 20–35 years                  | 1,131,678 (34.3) | (908,162, 1,355,194) | 995,629 (35.4)   | (788,430, 1,202,828) | –136,049 (–12.0) | (–440,829, 168,731) |
| 36–59 years                  | 1,026,316 (31.1) | (834,162, 1,218,470) | 845,212 (30.0)   | (668,065, 1,022,359) | –181,104 (–17.6) | (–442,454, 80,246)  |
| >60 years                    | 539,297 (16.3)   | (388,491, 690,103)   | 442,181 (15.7)   | (290,642, 593,720)   | –97,116 (–18.0)  | (–310,907, 116,675) |
| <b>Poisoning<sup>a</sup></b> |                  |                      |                  |                      |                  |                     |
| <b>Sex</b>                   |                  |                      |                  |                      |                  |                     |
| Male                         | 1,247,400 (62.8) | (928,194, 1,566,606) | 1,253,538 (63.7) | (932,845, 1,574,231) | 6,138 (0.5)      | (–446,340, 458,616) |
| Female                       | 744,682 (37.4)   | (604,605, 884,759)   | 715,828 (36.3)   | (572,828, 858,828)   | –28,854 (–3.9)   | (–229,031, 171,323) |
| <b>Age category</b>          |                  |                      |                  |                      |                  |                     |
| 0–19 years                   | 206,911 (10.4)   | (154,132, 259,690)   | 190,211 (9.7)    | (135,631, 244,791)   | –16,700 (–8.1)   | (–92,625, 59,225)   |
| 20–35 years                  | 645,363 (32.4)   | (509,868, 780,858)   | 657,852 (33.4)   | (525,589, 790,115)   | 12,489 (1.9)     | (–176,859, 201,837) |
| 36–59 years                  | 873,245 (43.9)   | (629,925, 1,116,565) | 869,039 (44.1)   | (623,039, 1,115,039) | –4,206 (–0.5)    | (–350,213, 341,801) |
| >60 years                    | 265,246 (13.3)   | (196,507, 333,985)   | 251,601 (12.8)   | (187,744, 315,458)   | –13,645 (–5.1)   | (–107,468, 80,178)  |

*Notes:* 95% CIs were calculated using the SAS SURVEYMEANS procedure that accounted for the sample weights and complex sample design. Boldface indicates statistical significance ( $p < 0.05$ ).

<sup>a</sup>Self-harm included nonfatal injury or poisoning resulting from a deliberate violent act inflicted on oneself with the intent to take one’s own life or with the intent to harm oneself; assault included nonfatal injuries where physical force by one or more persons is used with the intent of causing harm, injury, or death to another person, including intentional poisoning by another person and sexual assault; falls included nonfatal injuries received when a person descends abruptly due to the force of gravity and strikes a surface at the same or lower level; motor vehicle included nonfatal injury to a driver or passenger of a motor vehicle caused by a collision, rollover, crash or some other event involving another vehicle, an object, or a pedestrian; and poisoning included nonfatal ingestion, inhalation, absorption through the skin, or injection of so much of a drug, toxin, or other chemical that a harmful effect results (e.g., alcohol intoxication, drug overdose, carbon monoxide exposure).

Data source: National Electronic Injury Surveillance System – All Injuries program.
